# Supplementary material
Source: PubMed Central journal article supplement (PMC1805710)
Supplement: NIHMS17025-supplement-01.pdf [file NIHMS17025-supplement-01.pdf]

## **SUPPLEMENTAL DATA**

### **Sources of cell lines**

HaCat (human keratinocyte cell line) was a gift from Rajiv Khanna, Brisbane, Australia. MDAMC (human breast carcinoma cell line) was a gift from Irene Joab, Paris, France. HeLa and 293 were purchased from ATCC. The EBV-transformed B lymphoblastoid cell lines MS-LCL and CM-LCL were generated by culturing PBMCs of a healthy donor with supernatant of the marmoset cell line B95.8 with RPMI-1640 + 20% FCS + 2 mM glutamine + 2 µg/ml gentamycin + 1 µg/ml cyclosporine A. The two EBV-positive Hodgkin's lymphoma cell lines RPMI6666 and L591 were purchased from ATCC and a gift from Martina Vockerodt and Dieter Kube, Göttingen, Germany, respectively. Mouse hybridomas IVA12 (anti-human MHC class II) and w6/32 (anti-human MHC class I) were purchased from ATCC.

### **Generation of influenza A virus matrix protein (MP1)-specific T cell clones**

CD14-negative PBMCs isolated from whole blood of a lab donor (HLA-A\*0201, -A\*6801, -B\*4402, -B\*0702, -C\*0501, -C\*0702, -DRB1\*1501, -DRB1\*0401, -DRB5\*01, -DRB4\*01, -DQB1\*0602 and -DQB1\*0301) were stimulated with autologous mature DCs electroporated with in vitro transcribed Influenza A MP1-RNA, a gift from Irina Tcherepanova, Durham, NC (PBMC:DC ratio = 30:1, medium: RPMI-1640 with 5% human serum + glutamine + gentamycin). DCs were electroporated with 10 µg RNA in Opti-MEM at 300 V and 150 µF with a BioRad Gene Pulser plus Capacitance Extender (BioRad). On day 8 of PBMC/DC coculture, the stimulation was repeated and 10 U/ml IL-2 were added to enhance T cell survival. On day 21, the surviving cells were cloned by limiting dilution at 10, 1, or 0.3 cells/well and expanded in RPMI-1640 + 8% PHS + 150 U/ml rhIL-2 (Chiron) + 1µg/ml PHA-L (Sigma-Aldrich) + glutamine + gentamycin. 10<sup>5</sup> irradiated PBMCs/well and 10<sup>4</sup> irradiated LCLs/well were added as feeder cells. On day 40, expanded cells were tested in split-well IFN $\gamma$  ELISPOT assays for recognition of an MP1 peptide mix (64 15-mer peptides overlapping by 10

amino acids) and the HLA-A2 immunodominant epitope MP1<sub>58-66</sub> (GILGFVFTL). All peptides were purchased from the Proteomics Resource Center of the Rockefeller University. MP1-specific, homogenously CD4<sup>+</sup> or CD8<sup>+</sup> clones were expanded as described above and frozen into aliquots.

### **Inhibitors and recombinant proteins**

Chloroquine (CQ) and protease inhibitors (E64, Leupeptin and Pepstatin A) were purchased from Sigma. Recombinant human IFN- $\gamma$  was purchased from ProSpec-Tany TechnoGene LTD, Israel and was used at 200 U/ml to induce MHC class II expression. Recombinant IFN- $\alpha$ -2b was from Schering Corporation, Kenilworth, NJ.

### **Generation of expression plasmids and lentiviral constructs**

The cDNA of human MAP1LC3B sequence (NM\_022818) was cloned into the mammalian expression vector pEGFP-C2 (Clontech). The cDNA of Influenza A/WSN/33 matrix protein 1 (MP1) was PCR-amplified from the pCAGGS/MCS-MP1 vector, a gift from Peter Palese, Mount Sinai School of Medicine, New York, with or without a stop codon at the 3' end. The PCR products then were inserted into the pEGFP-LC3 vector in place of the EGFP sequence to obtain MP1-LC3 fusion constructs. For lentiviral constructs, the EGFP-LC3, MP1-LC3 or MP1Stop-LC3 sequences were subcloned into the lentiviral vector pHR-SIN-CSGW $\Delta$ NotI, a gift from Jeremy Luban, Columbia University, New York. For production of lentiviral particles, lentiviral vectors were co-transfected with the helper plasmids pCMV $\Delta$ R8.91 and pMDG into 293T cells by calcium phosphate transfection. Culture supernatants containing recombinant viral particles were harvested on day 1, 2 and 3 after transfection, filtered through a 0.45  $\mu$ m filter and frozen at  $-80^{\circ}\text{C}$ .

### **Lysate preparation and immunoblotting**

Cells were lysed in ice cold lysis buffer (50 mM Tris-HCl pH 8.0, 140 mM NaCl, 1.5 mM MgCl<sub>2</sub>, 0.5% NP-40 with Complete protease inhibitor cocktail from Roche) for 5 min on ice (about 10<sup>6</sup> cells/200 µl). Whole cells and cell debris were pelleted by low speed centrifugation (400 g, 3 min) and cleared supernatants were transferred to a new tube. Protein concentration was determined by BCA protein assay (Pierce). Samples were boiled for 5 min in the presence of 4x SDS-PAGE-loading buffer (250 mM Tris-HCl pH 6.8, 40% glycerol, 8% SDS, 0.57 M β-mercaptoethanol, 0.12% bromophenol blue). Equal amounts of protein were run on 11 or 12% SDS-PAGE gels and transferred onto a PVDF membrane (Hybond-P, Amersham Biosciences). Primary antibodies were visualized with HRP-conjugated goat anti-rabbit or anti-mouse IgG (Biorad) and the ECLplus detection system (Amersham Biosciences).

### **Flow cytometry**

MHC class I and II surface levels on T cell targets were measured by staining cells with IVA12 or w6/32 hybridoma supernatants and AlexaFluor488-conjugated rabbit anti-mouse IgG (Invitrogen-Molecular Probes). Cells were analyzed on a FACScalibur instrument (Becton-Dickinson).

**Figure S1:**

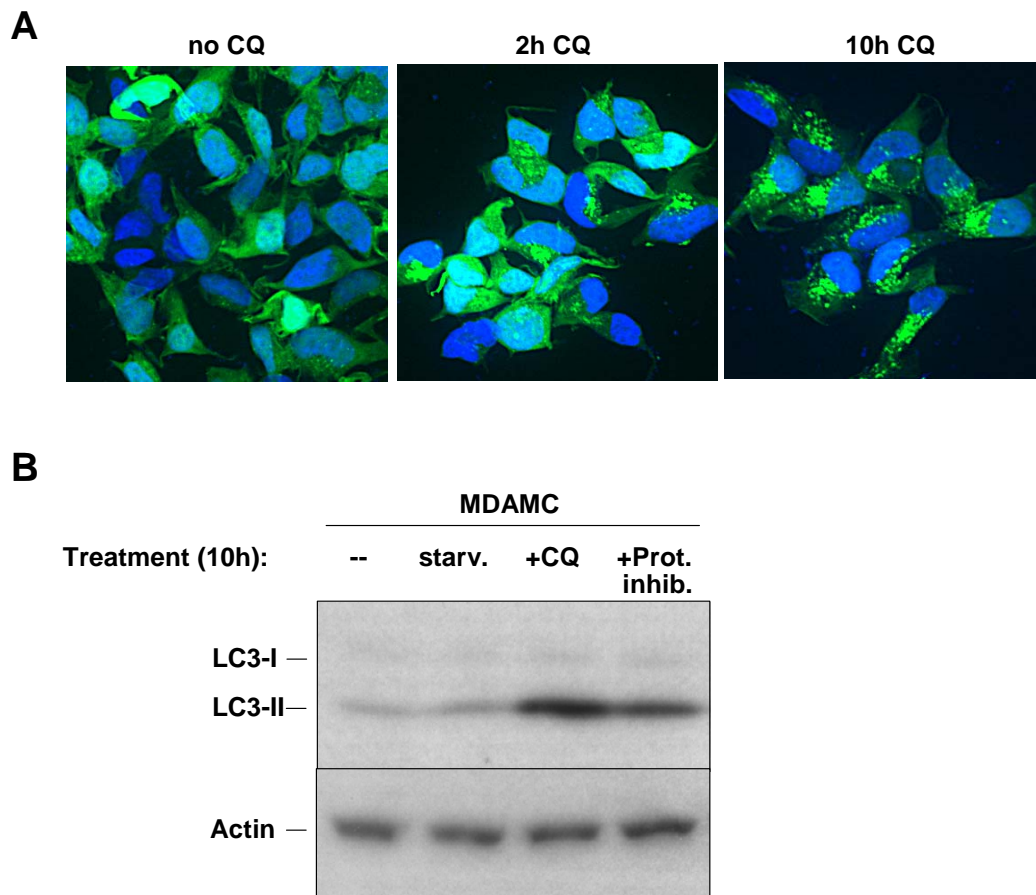

**Figure S1: Chloroquine treatment induces gradual accumulation of GFP-LC3 in autolysosomes and differs substantially from nutrient starvation**

(A) 293 cells stably transfected with a GFP-LC3 reporter construct were left untreated (no CQ) or were treated with 50  $\mu$ M chloroquine (CQ) for 2 or 10 hours. Cells were fixed, stained with DAPI and analyzed by fluorescence microscopy. Inhibition of lysosomal acidification with CQ leads to a gradual accumulation of GFP-LC3-labeled autophagosomes over time. Representative fields from one experiment out of two are shown.

(B) MDAMC cells were left untreated (--), cultured in Hanks Balanced Salt Solution (starv.), treated with 50  $\mu$ M chloroquine (+CQ) or with the protease inhibitors E64 (28  $\mu$ M), Leupeptin (40  $\mu$ M) and Pepstatin A (15  $\mu$ M) (+Prot. inhib.) for 10 hours. Whole cell lysates were run on a 12% SDS-PAGE

gel and LC3-I and II were visualized by anti-LC3 Western blotting. Actin blot demonstrates equal protein loading. While nutrient starvation induces LC3-II only weakly, inhibition of lysosomal proteases by treatment with CQ or the protease inhibitors E64, Leupeptin and Pepstatin A leads to a strong accumulation of LC3-II. One of two experiments is shown.



**Figure S3:**

**A**

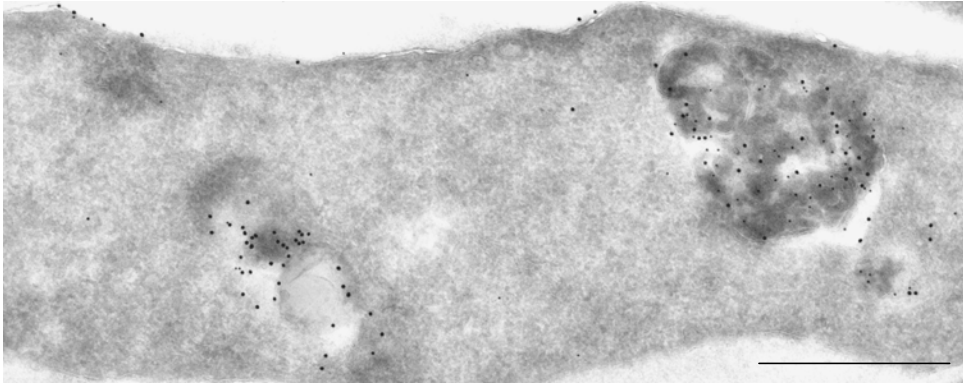

**B**

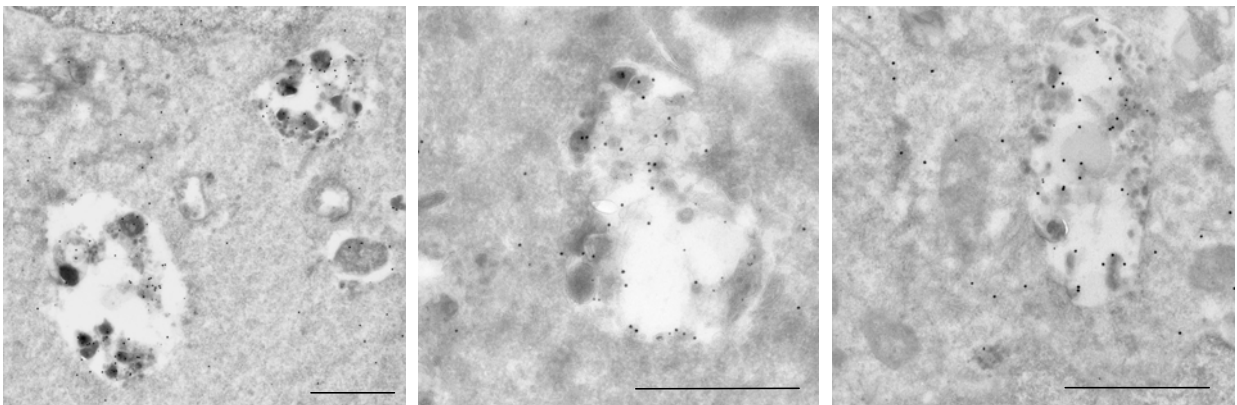

**Figure S3: Immuno-electron microscopy of MHC class II/GFP-LC3 labeled cryosections**

(A) Ultrathin cryosections of PFA-fixed MDAMC-GFP-LC3 cells were double-labeled with anti-HLA-DR antiserum/15 nm gold particles and anti-GFP antiserum/10 nm gold particles and analyzed by electron microscopy. MHC class II labeling can be seen both on GFP-LC3-positive electron-dense multivesicular compartments and on the plasma membrane. One representative field from one experiment out of three is shown. Scale bar: 1  $\mu$ m.

(B) MDAMC-GFP-LC3 cells were treated with 50  $\mu$ M CQ for 10h and ultrathin cryosections were double-labeled for MHC class II (10 nm gold) and GFP (15 nm gold) and analyzed by electron-microscopy. Double-labeled multivesicular compartments frequently appear expanded and swollen,

with a diameter of  $>1 \mu\text{m}$  and some empty space. Three representative fields from one experiment out of three are shown. Scale bar:  $1 \mu\text{m}$ .



**Figure S4:**

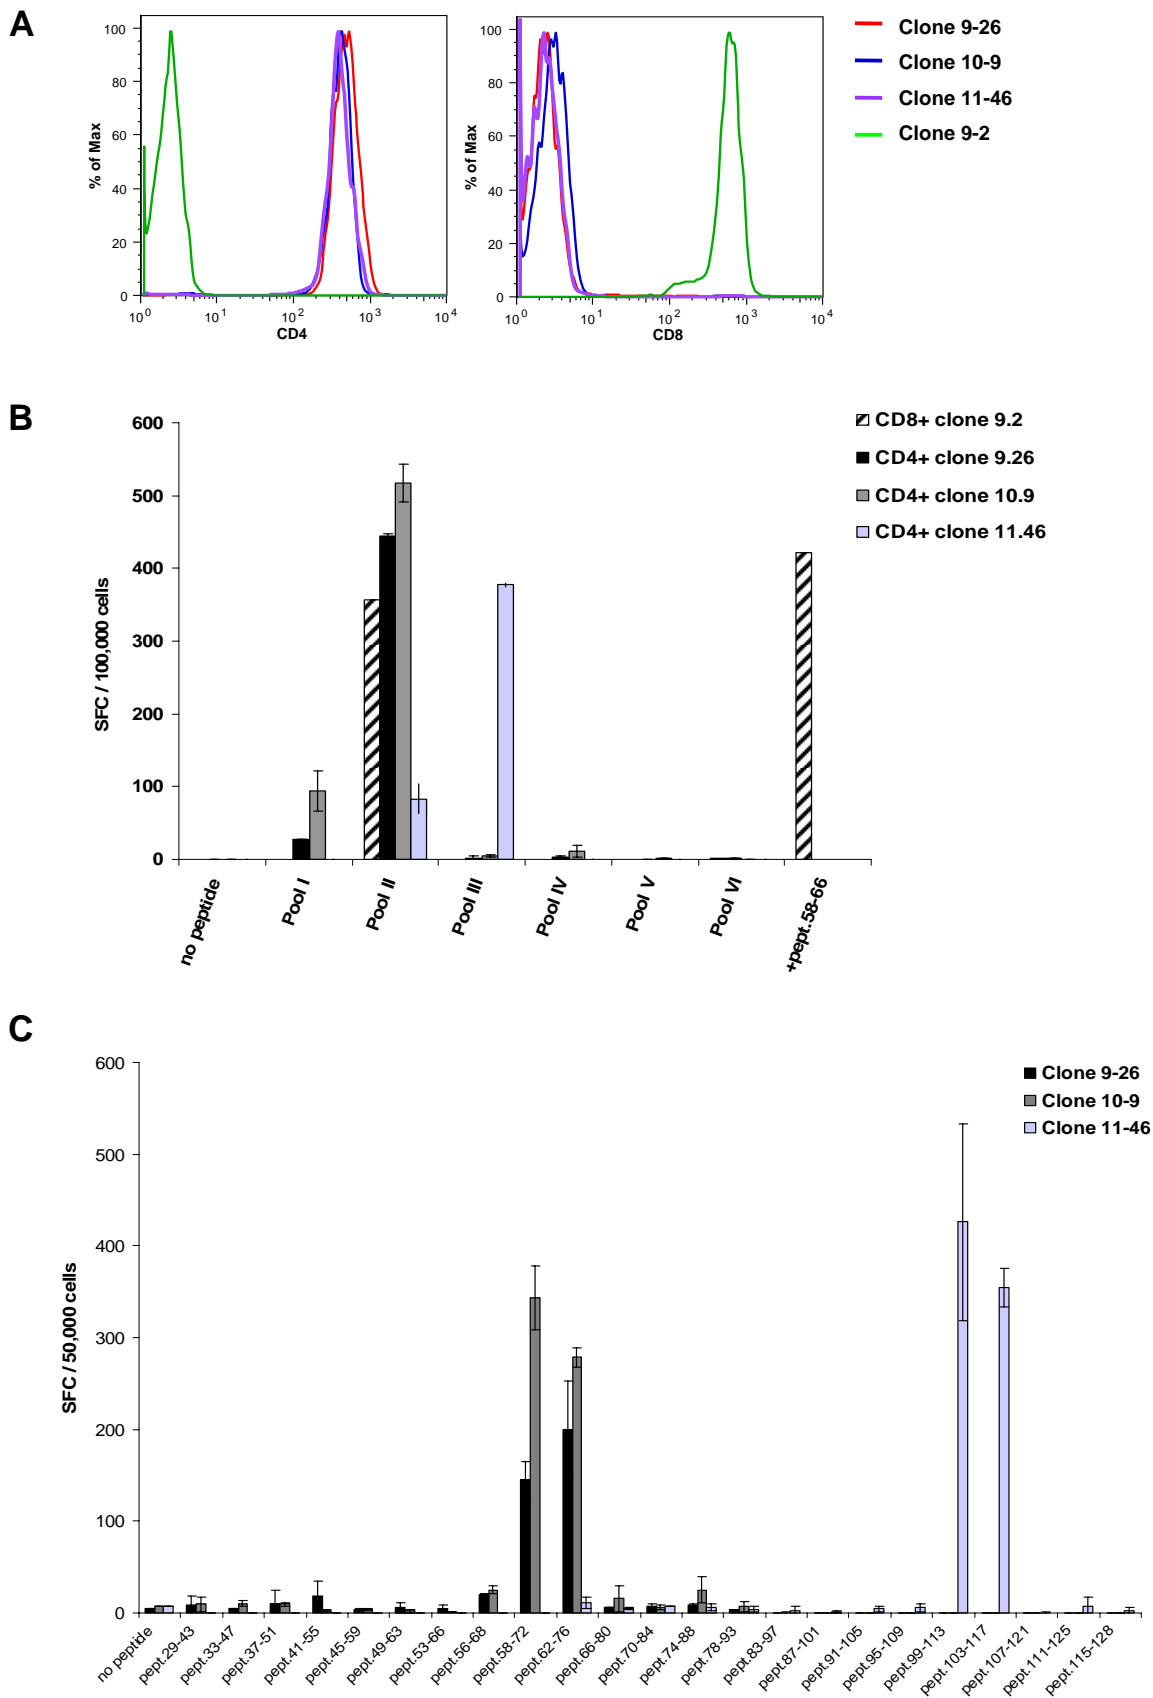

**Figure S4: Characterization of Influenza MP1-specific CD4<sup>+</sup> and CD8<sup>+</sup> T cell clones**

(A) CD4 and CD8 expression of T cell clones was analyzed by flow cytometry. Clones 9.26, 10.9 and 11.46 were homogenously CD4<sup>+</sup>CD8<sup>-</sup> and clone 9.2 was homogenously CD8<sup>+</sup>CD4<sup>-</sup>.

(B) Recognition of MP1 peptides by CD4<sup>+</sup> T cell clones in IFN- $\gamma$  ELISPOT assays. An MP1 peptide library (64 15-mer peptides overlapping by 10 amino acids) was divided in 6 subpools covering MP1 amino acid positions 1-51 (pool I), 41-88 (pool II), 78-128 (pool III), 118-163 (pool IV), 152-203 (pool V) and 193-252 (pool VI). Clones 9.2, 9.26 and 10.9 responded specifically to pool II and clone 11.46 to pool III. In addition, the CD8<sup>+</sup> T cell clone 9.2, but not the CD4<sup>+</sup> T cell clones, recognized the HLA-A2 restricted MP1 epitope 58-66. Error bars indicate standard deviations.

(C) MP1-specific CD4<sup>+</sup> T cell clones were tested for recognition of individual peptides covering MP1 amino acid sequence 29-128, including all peptides of MP1 pools II and III. Clones 9.26 and 10.9 specifically recognized peptide epitope MP1<sub>62-72</sub> and clone 11.46 was specific for epitope MP1<sub>103-113</sub>. Error bars indicate standard deviations.

Figure S5:

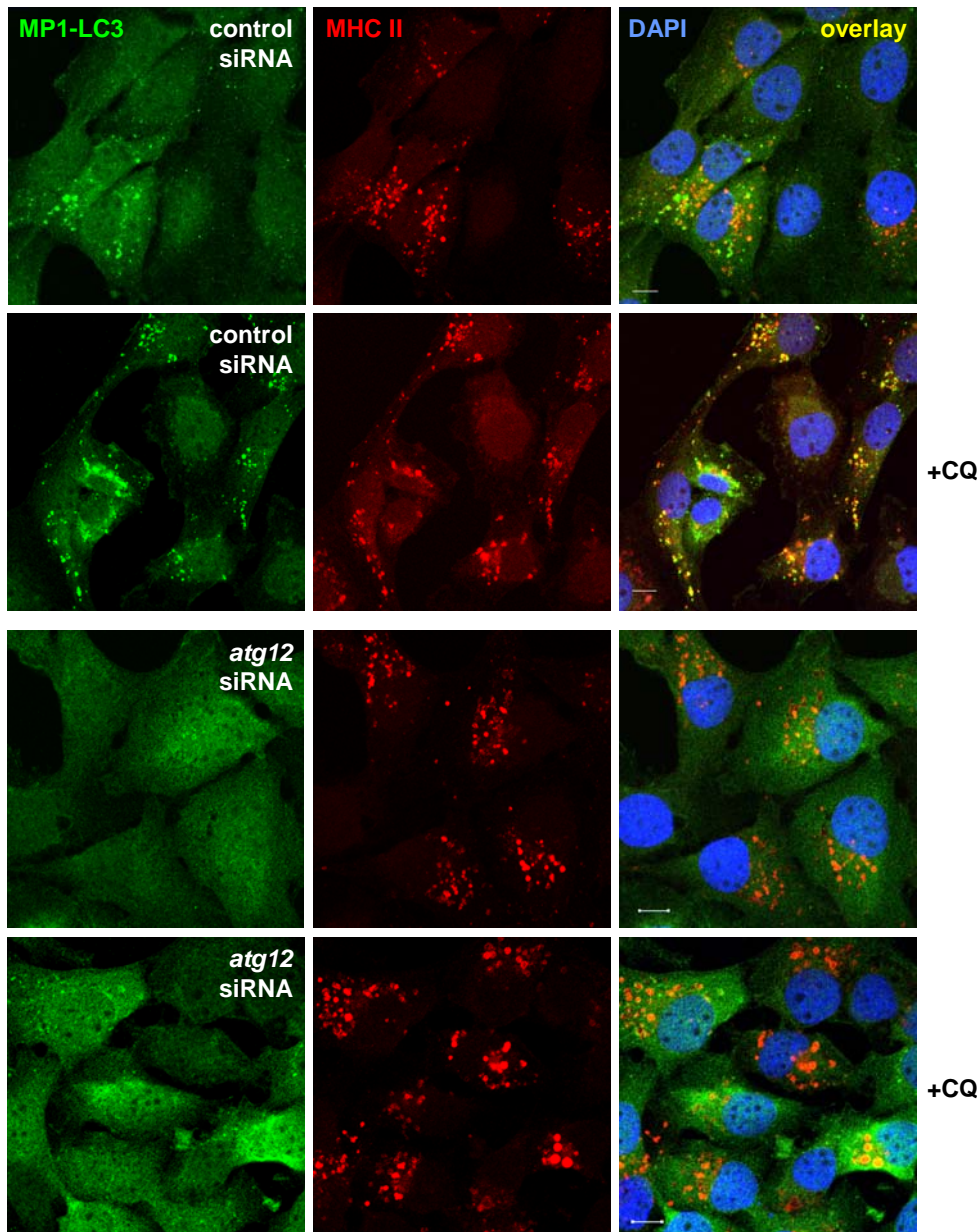

**Figure S5: Macroautophagy is required for delivery of MP1-LC3 to MHC class II loading compartments**

MDAMC cells stably expressing MP1-LC3 were transfected with control siRNA (specific for *firefly luciferase*) or siRNA specific for *atg12*. After 36 h, cells were treated with 200 U/ml IFN $\gamma$  to upregulate MHC class II expression and were cultured for another 36 h. To prevent degradation of MP1-LC3 by lysosomal proteases, cells were treated with 50  $\mu$ M chloroquine (CQ) during the last 6

hours of the culture, where indicated (+CQ). Cells were fixed, stained with MP1- and MHC class II-specific antibodies and DAPI and analyzed by confocal microscopy. Scale bar: 10  $\mu$ m. Representative fields from one experiment out of two are shown. In control siRNA-treated cells, a substantial fraction of MP1-LC3-containing vesicles can be observed to colocalize with MHC class II compartments, whereas this colocalization is completely abrogated after *atg12* knockdown.
